# Supplementary material
Source: publisher figshare collection journal article supplement (https://frontiersin.figshare.com/ndownloader/files/14702369)
Supplement: Supplementary file 1 [file 14702369]

## Sheet: NBP1001_barilari_data_paper
Supplementary Table 2: Hydrographic dataset analyzed in this study. See "Material and Method" section , as well as Supplementary Material, for details of data collection and analysis
Cruise	CTD (ship)	Station (article)	yyyy-mm-ddThh:mm:ss.sss	Longitude [degrees_east]	Latitude [degrees_north]	Bot. Depth [m]	DEPTH [M]	Temperature [deg C]	Salinity [PSU]	Oxygen [ml/l]	Phosphate [uM]	Nitrite [uM]	Nitrate+Nitrite [uM]	Ammonia [uM]	Silicate [uM]	18O (per mil)	18O SD
NBP1001	34	1	2010-01-24T23:27	-64.87	-65.79	664	2	1.1289	33.3037	8.48559	1.17	0.2646	18.6	1.28	70.7	-0.465	0.043
NBP1001	34	1	2010-01-24T23:27	-64.87	-65.79	664	10	0.8476	33.455	8.32813	1.37	0.2478	20.2	1.99	70.4	-0.512	0.047
NBP1001	34	1	2010-01-24T23:27	-64.87	-65.79	664	25	0.551	33.6359	7.94457	1.56	0.2167	23.1	2.01	73.4	-0.445	0.05
NBP1001	34	1	2010-01-24T23:27	-64.87	-65.79	664	50	-0.132	33.9464	6.91831	1.92	0.182	29	0.927	81.8	-0.32	0.035
NBP1001	34	1	2010-01-24T23:27	-64.87	-65.79	664	75	-0.2657	34.1582	6.35505	2.07	0.181	31.6	0.316	87.1	0.231	0.056
NBP1001	34	1	2010-01-24T23:27	-64.87	-65.79	664	110	0.4017	34.3126	5.04101						-0.241	0.039
NBP1001	34	1	2010-01-24T23:27	-64.87	-65.79	664	150	0.5888	34.3828	4.94015	2.27	0.061	34.1	0.0453	96.7	-0.178	0.025
NBP1001	34	1	2010-01-24T23:27	-64.87	-65.79	664	300	0.8727	34.5036	4.94837	2.27	0.062	33.8	-0.0123	96.3	0.001	0.047
NBP1001	34	1	2010-01-24T23:27	-64.87	-65.79	664	500	0.9291	34.5222	4.9215	2.21	0.076	33.3	0.02	94	0.192	0.033
NBP1001	34	1	2010-01-24T23:27	-64.87	-65.79	664	658	0.9487	34.5259	4.88811	2.23	0.092	33.3	0.0166	94.2	-0.051	0.052
NBP1001	35	2	2010-01-24T23:33	-64.83	-65.8	359	2	1.3447	33.1826	8.54178	1.14	0.2659	18.4	1.29	71.3	-0.605	0.044
NBP1001	35	2	2010-01-24T23:33	-64.83	-65.8	359	10	0.9496	33.3359	8.54444	1.27	0.2618	20.1	1.85	72.4	-0.519	0.031
NBP1001	35	2	2010-01-24T23:33	-64.83	-65.8	359	25	0.5973	33.6209	7.95128	1.43	0.2393	21.5	2.09	71	-0.468	0.028
NBP1001	35	2	2010-01-24T23:33	-64.83	-65.8	359	50	-0.0716	33.9156	7.05881	1.89	0.187	27.6	1.03	78.9	-0.357	0.039
NBP1001	35	2	2010-01-24T23:33	-64.83	-65.8	359	75	-0.1459	34.1258	6.29282	2.12	0.175	32	0.248	87.7	-0.176	0.046
NBP1001	35	2	2010-01-24T23:33	-64.83	-65.8	359	100	0.1581	34.2537	5.40667	2.27	0.143	33.4	0.0331	91.9	-0.189	0.06
NBP1001	35	2	2010-01-24T23:33	-64.83	-65.8	359	140	0.4348	34.3671	5.27528	2.19	0.058	33.6	0.0211	95.9	-0.183	0.053
NBP1001	35	2	2010-01-24T23:33	-64.83	-65.8	359	200	0.6871	34.4282	4.96896	2.29	0.059	33.9	-0.00432	96	-0.1	0.041
NBP1001	35	2	2010-01-24T23:33	-64.83	-65.8	359	250	0.8408	34.4855	4.92166	2.25	0.071	33.4	0.0814	93.6	-0.125	0.044
NBP1001	35	2	2010-01-24T23:33	-64.83	-65.8	359	300	0.8902	34.5094	4.93947	2.18	0.074	33	0.00496	93.2	-0.083	0.049
NBP1001	35	2	2010-01-24T23:33	-64.83	-65.8	359	356	0.9191	34.5207	4.91872	2.24	0.084	33.2	0.0234	93.8	0.016	0.026
NBP1001	33	3	2010-01-24T19:14	-64.83	-65.82	590	2	1.5005	33.204	8.37244	1.21	0.2528	18.7	1.87	70.9	-0.559	0.046
NBP1001	33	3	2010-01-24T19:14	-64.83	-65.82	590	5	1.3094	33.2533	8.33986	1.23	0.2543	18.7	1.9	70.6	-0.613	0.055
NBP1001	33	3	2010-01-24T19:14	-64.83	-65.82	590	20	0.618	33.4895	8.10514	1.48	0.2308	22.1	2.03	70.8	-0.427	0.031
NBP1001	33	3	2010-01-24T19:14	-64.83	-65.82	590	35	0.5076	33.7571	7.97836	1.54	0.2278	22.8	2.04	71.2	-0.315	0.042
NBP1001	33	3	2010-01-24T19:14	-64.83	-65.82	590	50	-0.1218	33.842	7.14085	1.89	0.183	27.9	1.15	80.3	-0.299	0.03
NBP1001	33	3	2010-01-24T19:14	-64.83	-65.82	590	75	-0.1305	34.1236	6.26225	2.11	0.178	31.4	0.505	86.8	-0.269	0.036
NBP1001	33	3	2010-01-24T19:14	-64.83	-65.82	590	100	0.0267	34.2468	5.82371	2.22	0.158	33	0.0716	92.1	-0.204	0.033
NBP1001	33	3	2010-01-24T19:14	-64.83	-65.82	590	150	0.5828	34.3844	4.96043	2.25	0.065	34.2	0.0313	96.7	-0.187	0.042
NBP1001	33	3	2010-01-24T19:14	-64.83	-65.82	590	200	0.6935	34.4235	4.91763	2.29	0.063	33.6	0.00334	94.3	-0.115	0.031
NBP1001	33	3	2010-01-24T19:14	-64.83	-65.82	590	350	0.9172	34.5191	4.9243	2.23	0.059	33.3	-0.00854	94.5	-0.05	0.024
NBP1001	33	3	2010-01-24T19:14	-64.83	-65.82	590	582	0.9567	34.53	4.88955	2.25	0.072	33.2	0.0509	94.9	-0.047	0.07
NBP1001	86	4	2010-02-23T03:30	-64.75	-65.86	500	2	0.7882	32.4957	10.396	0.354	0.396	6.37	1.04	57.7	-1.024	0.043
NBP1001	86	4	2010-02-23T03:30	-64.75	-65.86	500	10	0.7193	33.032	9.90495	0.297	0.385	5.34	0.91	57.6	-0.977	0.024
NBP1001	86	4	2010-02-23T03:30	-64.75	-65.86	500	20	0.3139	33.4851	7.47221	0.86	0.312	13.5	1.63	65.9	-0.532	0.056
NBP1001	86	4	2010-02-23T03:30	-64.75	-65.86	500	35	0.2014	33.7516	6.91308	1.89	0.244	27.3	2.51	82.9	-0.441	0.046
NBP1001	86	4	2010-02-23T03:30	-64.75	-65.86	500	50	0.0438	33.9266	6.82568	2.02	0.235	28.8	2.31	83.4	-0.228	0.033
NBP1001	86	4	2010-02-23T03:30	-64.75	-65.86	500	75	-0.1354	34.0979	6.23345	2.13	0.275	31.4	1.14	86.7	-0.345	0.05
NBP1001	86	4	2010-02-23T03:30	-64.75	-65.86	500	100	-0.0291	34.2046	5.71575	2.29	0.239	33.8	0.219	92.8	-0.116	0.034
NBP1001	86	4	2010-02-23T03:30	-64.75	-65.86	500	150	0.4902	34.3553	5.01377	2.35	0.1146	34.3	0.198	96.2	-0.031	0.036
NBP1001	86	4	2010-02-23T03:30	-64.75	-65.86	500	200	0.6793	34.4278	4.97823	2.3	0.1007	34.5	0.117	97.7	-0.04	0.042
NBP1001	86	4	2010-02-23T03:30	-64.75	-65.86	500	350	0.9388	34.5255	4.88149	2.28	0.0617	33.7	0.0888	97.6	0.094	0.032
NBP1001	86	4	2010-02-23T03:30	-64.75	-65.86	500	490	0.9611	34.5307	4.84989	2.31	0.0453	33.7	0.082	96.6	0.044	0.038
NBP1001	36	5	2010-01-25T01:04	-64.69	-65.9	621	1	1.3455	32.4422	8.55525	1.06	0.2736	14.9	3.19	70.5	-0.85	0.064
NBP1001	36	5	2010-01-25T01:04	-64.69	-65.9	621	10	0.9871	32.7296	8.57986	1.36	0.2524	19.8	2.5	73.8	-0.663	0.05
NBP1001	36	5	2010-01-25T01:04	-64.69	-65.9	621	25	0.0897	33.3913	7.66268	1.53	0.246	21.6	2.67	74.2	-0.51	0.014
NBP1001	36	5	2010-01-25T01:04	-64.69	-65.9	621	40	-0.0764	33.6531	7.54505	1.74	0.2165	25.3	1.72	76.3	-0.434	0.037
NBP1001	36	5	2010-01-25T01:04	-64.69	-65.9	621	70	-0.2747	34.0351	6.23918	2.17	0.232	31.8	0.554	87.5	-0.299	0.038
NBP1001	36	5	2010-01-25T01:04	-64.69	-65.9	621	100	0.0076	34.1782	5.46492	2.23	0.2184	33.3	0.155	92.4	-0.287	0.053
NBP1001	36	5	2010-01-25T01:04	-64.69	-65.9	621	150	0.5066	34.3488	5.00079	2.24	0.097	33.7	-0.024	94.5	-0.103	0.048
NBP1001	36	5	2010-01-25T01:04	-64.69	-65.9	621	200	0.6948	34.4268	4.95355	2.28	0.08	33.3	0.0713	92.2	-0.143	0.026
NBP1001	36	5	2010-01-25T01:04	-64.69	-65.9	621	300	0.8755	34.5027	4.97571	2.16	0.074	33	0.0375	92	-0.246	0.038
NBP1001	36	5	2010-01-25T01:04	-64.69	-65.9	621	400	0.9251	34.5215	4.90803	2.21	0.064	33.1	-0.0362	92.8	-0.026	0.022
NBP1001	36	5	2010-01-25T01:04	-64.69	-65.9	621	607	0.9537	34.5284	4.88498	2.18	0.104	33.2	0.0115	94	-0.084	0.043
NBP1001	32	6	2010-01-23T02:14	-64.64	-65.94	611	1	0.5284	32.5315	8.46651	1.17	0.176	16.3	2.84	71.8	-0.846	0.033
NBP1001	32	6	2010-01-23T02:14	-64.64	-65.94	611	10	0.4834	32.8	8.35869	1.29	0.16	17.5	3.25	73.4	-0.638	0.06
NBP1001	32	6	2010-01-23T02:14	-64.64	-65.94	611	25	0.6286	33.2103	8.08008	1.41	0.139	19.6	3.21	75.4	-0.596	0.035
NBP1001	32	6	2010-01-23T02:14	-64.64	-65.94	611	50	-0.2412	33.68	7.20242	1.91	0.105	27.6	1.2	83.5	-0.414	0.032
NBP1001	32	6	2010-01-23T02:14	-64.64	-65.94	611	70	0.0298	34.1454	5.54474	2.23	0.082	32.9	0.264	92.9	-0.269	0.028
NBP1001	32	6	2010-01-23T02:14	-64.64	-65.94	611	100	0.2415	34.2259	5.20639	2.26	0.076	33.5	0.0735	95	-0.199	0.035
NBP1001	32	6	2010-01-23T02:14	-64.64	-65.94	611	200	0.6952	34.4219	4.94351	2.24	-0.017	33.8	0.00227	96.8	-0.174	0.026
NBP1001	32	6	2010-01-23T02:14	-64.64	-65.94	611	350	0.9156	34.5182	4.90767	2.23	-0.021	33.4	0.0398	95.9	-0.115	0.02
NBP1001	32	6	2010-01-23T02:14	-64.64	-65.94	611	500	0.9366	34.5251	4.91112	2.22	0.044	33.2	0.0487	95.2	-0.098	0.045
NBP1001	32	6	2010-01-23T02:14	-64.64	-65.94	611	605	0.9519	34.5282	4.88956	2.2	0.013	33.3	0.00506	95.3
NBP1001	37	7	2010-01-25T13:27	-64.66	-65.99	412	1	0.413	32.6789	8.3651	1.26	0.179	18.2	3.13	74.1	-0.83	0.042
NBP1001	37	7	2010-01-25T13:27	-64.66	-65.99	412	10	0.4416	32.7441	8.37245	1.31	0.168	18.5	3.12	74.4	-0.712	0.022
NBP1001	37	7	2010-01-25T13:27	-64.66	-65.99	412	20	0.1518	33.0226	8.15581	1.55	0.155	21.6	2.74	77.7	-0.582	0.03
NBP1001	37	7	2010-01-25T13:27	-64.66	-65.99	412	50	-0.2778	33.7906	6.70109	2.01	0.113	29.7	0.971	87.3	-0.376	0.047
NBP1001	37	7	2010-01-25T13:27	-64.66	-65.99	412	75	-0.0732	34.0744	5.63464	2.18	0.114	32.4	0.485	93.1	-0.244	0.023
NBP1001	37	7	2010-01-25T13:27	-64.66	-65.99	412	100	0.3434	34.2728	5.03111	2.27	0.045	33.7	0.0996	96.4	-0.19	0.035
NBP1001	37	7	2010-01-25T13:27	-64.66	-65.99	412	150	0.5327	34.362	4.97409	2.22	0.014	33.3	0.0183	94.2	-0.175	0.041
NBP1001	37	7	2010-01-25T13:27	-64.66	-65.99	412	200	0.6599	34.4082	4.93217	2.25	-0.005	33.1	-0.0591	93.9	-0.108	0.036
NBP1001	37	7	2010-01-25T13:27	-64.66	-65.99	412	300	0.9141	34.5177	4.91525	2.21	-0.016	33.1	0.00495	94.7	-0.09	0.022
NBP1001	37	7	2010-01-25T13:27	-64.66	-65.99	412	350	0.9255	34.5225	4.91019	2.19	-0.013	33.1	-0.0192	95.2	-0.05	0.053
NBP1001	37	7	2010-01-25T13:27	-64.66	-65.99	412	405	0.9319	34.5242	4.88447	2.22	0.009	33.2	0.0156	95.4	-0.085	0.026
